# Supplementary material for: Solvent-resolved fluorescent Ag nanocrystals capped with a novel terpyridine-based dye
Source: Royal Society of Chemistry journal article supplement (doi:10.1039/b815115f), 2009-01-01
Supplement: b815115f.pdf [file b815115f.pdf]

## Supplementary Information:

# Solvent-Resolved Fluorescent Ag Nanocrystals Capped with A Novel Terpyridine-Based Dye †

Yuanhao Gao,<sup>a</sup> Jieying Wu,<sup>a</sup> Qiong Zhao,<sup>a</sup> Lingxia Zheng,<sup>a</sup> Hongping Zhou,<sup>a</sup> Shengyi Zhang,<sup>a</sup>  
Jiaxiang Yang<sup>a</sup> and Yupeng Tian<sup>\*,a,b,c</sup>

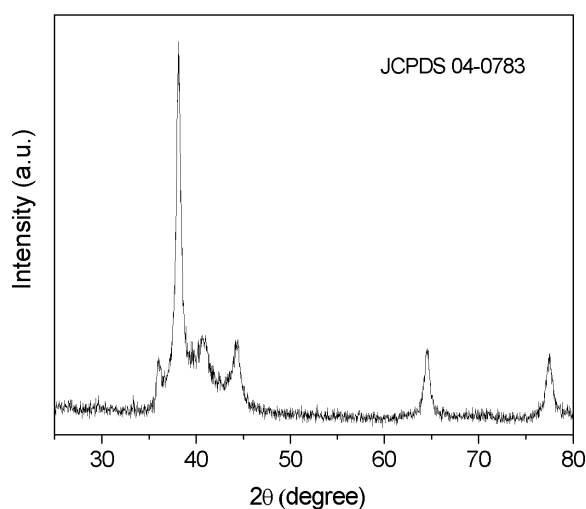

Fig. S1. XRD pattern of L-capped Ag nanocrystals.

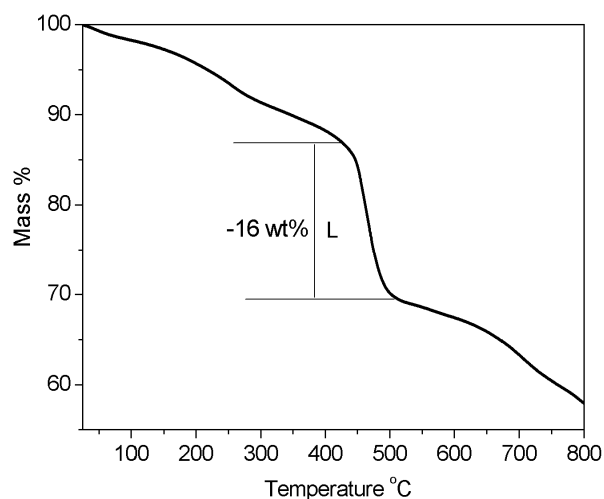

Fig. S2. TGA diagram of L-capped Ag nanocrystals

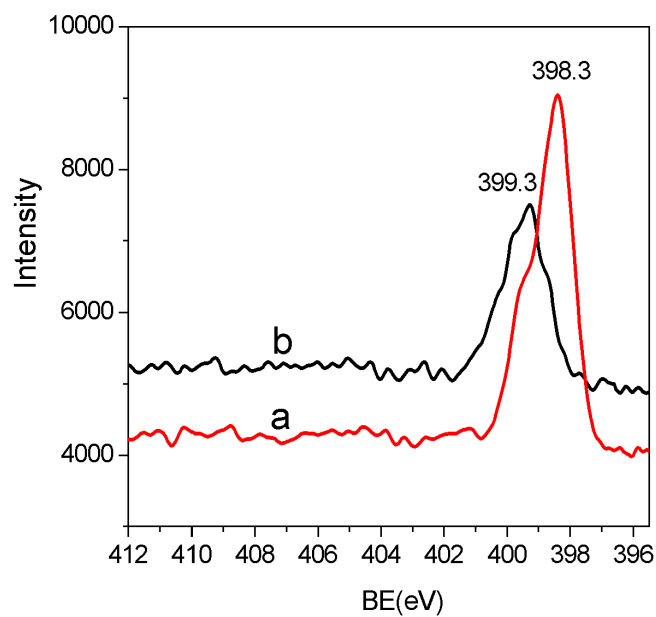

**Fig. S3.** X-ray photoelectron spectra (XPS) in the N 1s region: a) pure ligand L; b) L-capped Ag nanocrystals.

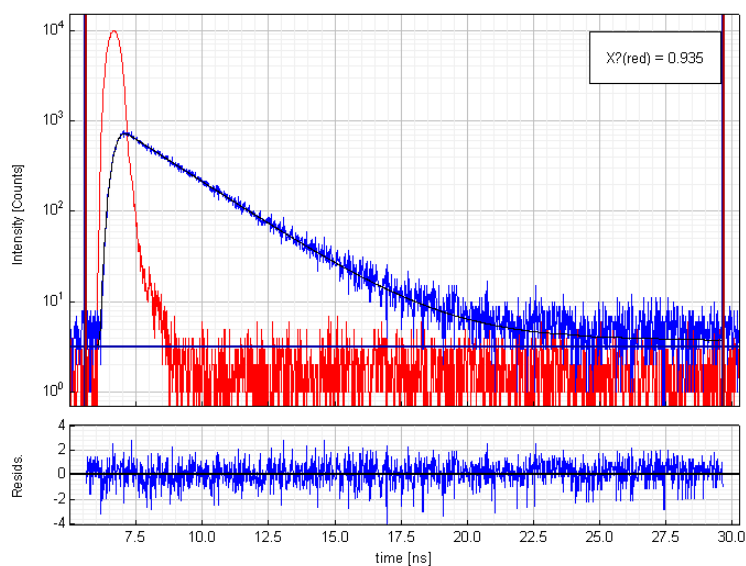

**Fig. S4.** Time-resolved decay curves of pure L in ethanol and the fitting result of the corresponding lifetime.

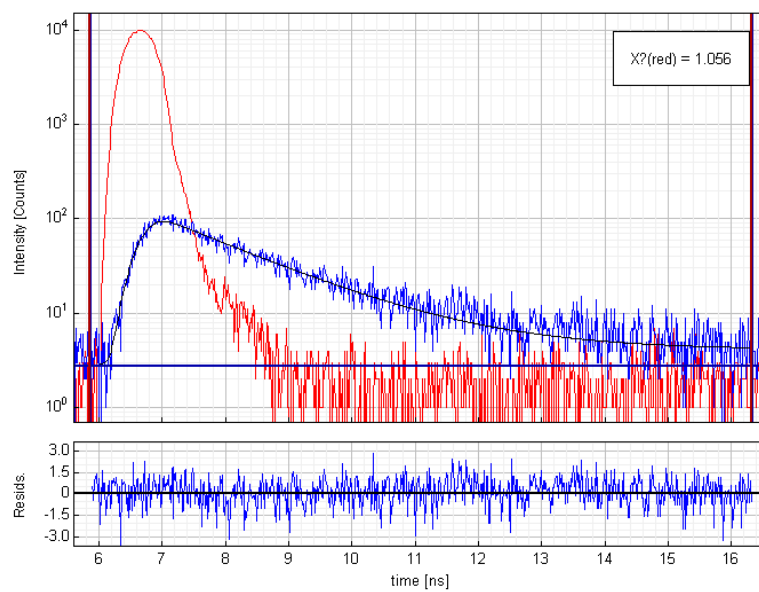

**Fig. S5.** Time-resolved decay curves of L-capped Ag NCs in ethanol and the fitting result of the corresponding lifetime.
